# Supplementary material for: Design of D–π–A type carbon nanohoops with enhanced nonlinear optical response: a size-dependent effect study
Source: Royal Society of Chemistry journal article supplement (doi:10.1039/d2nj06185f), 2023-01-01
Supplement: d2nj06185f1.pdf [file d2nj06185f1.pdf]

## Supporting Information

### Design of D- $\pi$ -A Type Carbon Nano hoop Enhanced Nonlinear Optical Response: A Size-Dependence Effect Study

Xiao Huang,<sup>a</sup> Xue Bai,<sup>a</sup> Ping-yao Gan,<sup>a</sup> Wen-bo Liu,<sup>a</sup> Han Yan,<sup>a</sup> Feng-wei Gao,<sup>\*a,b</sup> Hong-liang Xu,<sup>\*c</sup> Zhong-min Su<sup>\*a,d</sup>

<sup>a</sup> School of Chemistry and Environmental Engineering, Changchun University of Science and Technology, 7989 Weixing Road, Changchun 130012, China.

<sup>b</sup> Chongqing Research Institute, Changchun University of Science and Technology, No.618 Liangjiang Avenue, Longxing Town, Yubei District, Chongqing City 401135, China.

E-mail: gaofw@cust.edu.cn

<sup>c</sup> Institute of Functional Material Chemistry, Department of Chemistry, Northeast Normal University, Changchun 130024, China.

E-mail: hlxu@nenu.edu.cn

<sup>d</sup> State Key Laboratory of Supramolecular Structure and Materials, Institute of Theoretical Chemistry, College of Chemistry, Jilin University, Changchun 130021, China.

E-mail: zmsu@nenu.edu.cn

#### Table of contents

|                                                                                                                                                                       |   |
|-----------------------------------------------------------------------------------------------------------------------------------------------------------------------|---|
| Table S1. The components of the first hyperpolarizabilities $\beta_{\text{tot}}$ ( $\times 10^{-30}$ esu) of the studied D-CM2PnP-m-A at the CAM-B3LYP/6-31G** level  | 2 |
| Table S2. The calculated $\rho$ , $\Phi_{J=1}$ and $\Phi_{J=3}$ values of the D-CM2PnP-A (n=4, 6, 8, 10, 12) in the three wavelengths at the CAM-B3LYP/6-31 G** level | 3 |
| Figure S1. The main view and side view of the D-CM2PnP-A (n=4, 6, 8, 10, 12)                                                                                          | 4 |
| Figure S2. Frontier molecular orbital energy levels and molecular orbital diagram of CM2P4P                                                                           | 5 |
| Figure S3. The first hyperpolarizabilities of the D-CM2PnP-A (n=4, 6, 8, 10, 12) calculated by using various functionals with the 6-31G** basis set                   | 6 |
| Figure S4. Relationship between the $\alpha$ values and the corresponding $\langle R^2 \rangle$ values of the D-CM2PnP-A (n=4, 6, 8, 10, 12)                          | 7 |
| Figure S5. The molecular orbitals of the main excited states of the D-CM2PnP-A (n=4, 6, 8, 10, 12)                                                                    | 8 |

## Supporting Information

---

Table S1. The components of the first hyperpolarizabilities  $\beta_{\text{tot}}$  ( $\times 10^{-30}$  esu) of the studied D-CM2PnP-m-A at the CAM-B3LYP/6-31G\*\* level

| Compound      | $\beta_x$ | $\beta_y$ | $\beta_z$ | $\beta_{\text{tot}}$ |
|---------------|-----------|-----------|-----------|----------------------|
| D-CM2P8P-2-A  | 27.30     | 1.21      | 0.26      | 27.30                |
| D-CM2P10P-3-A | 39.22     | 0.52      | 1.81      | 39.30                |
| D-CM2P12P-4-A | 48.55     | 0.35      | 0.78      | 48.64                |

---

## Supporting Information

---

Table S2. The calculated  $\rho$ ,  $\Phi_{J=1}$  and  $\Phi_{J=3}$  values of D-CM2PnP-A (n=4, 6, 8, 10, 12) in the three wavelengths at the CAM-B3LYP/6-31G\*\* level

| Compound    | $\rho$ | $\Phi_{J=1}$ (au) | $\Phi_{J=3}$ (au) |
|-------------|--------|-------------------|-------------------|
| 1064 nm     |        |                   |                   |
| D-CM2P4P-A  | 0.58   | 0.63              | 0.37              |
| D-CM2P6P-A  | 0.51   | 0.66              | 0.34              |
| D-CM2P8P-A  | 0.48   | 0.68              | 0.32              |
| D-CM2P10P-A | 0.43   | 0.70              | 0.30              |
| D-CM2P12P-A | 0.43   | 0.70              | 0.30              |
| 1460 nm     |        |                   |                   |
| D-CM2P4P-A  | 0.62   | 0.62              | 0.38              |
| D-CM2P6P-A  | 0.53   | 0.66              | 0.35              |
| D-CM2P8P-A  | 0.50   | 0.67              | 0.33              |
| D-CM2P10P-A | 0.44   | 0.69              | 0.31              |
| D-CM2P12P-A | 0.45   | 0.69              | 0.31              |
| 1907 nm     |        |                   |                   |
| D-CM2P4P-A  | 0.64   | 0.611             | 0.39              |
| D-CM2P6P-A  | 0.54   | 0.650             | 0.35              |
| D-CM2P8P-A  | 0.51   | 0.662             | 0.34              |
| D-CM2P10P-A | 0.46   | 0.685             | 0.32              |
| D-CM2P12P-A | 0.46   | 0.683             | 0.32              |

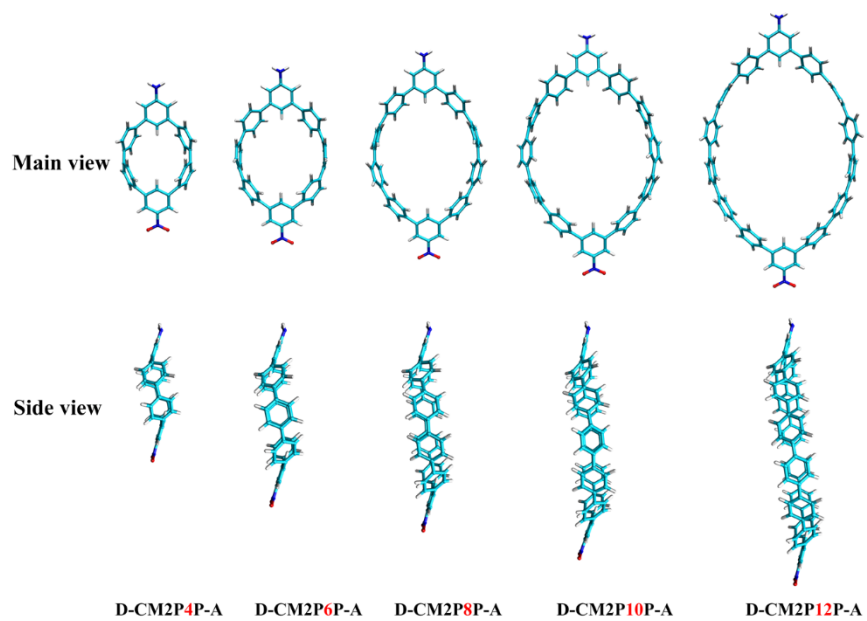

Figure S1. The main view and side view of the D-CM2PnP-A (n=4, 6, 8, 10, 12)

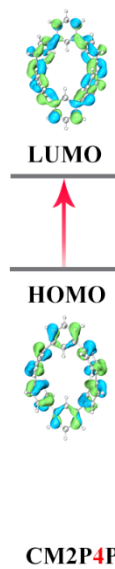

Figure S2. Frontier molecular orbital energy levels and molecular orbital diagram of CM2P4P

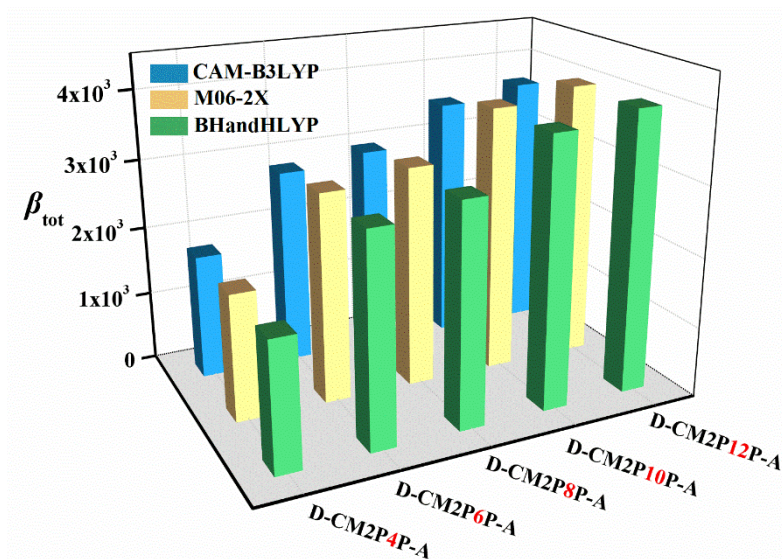

Figure S3. The first hyperpolarizabilities of the D-CM2PnP-A (n=4, 6, 8, 10, 12) calculated by using various functionals with the 6-31G\*\* basis set

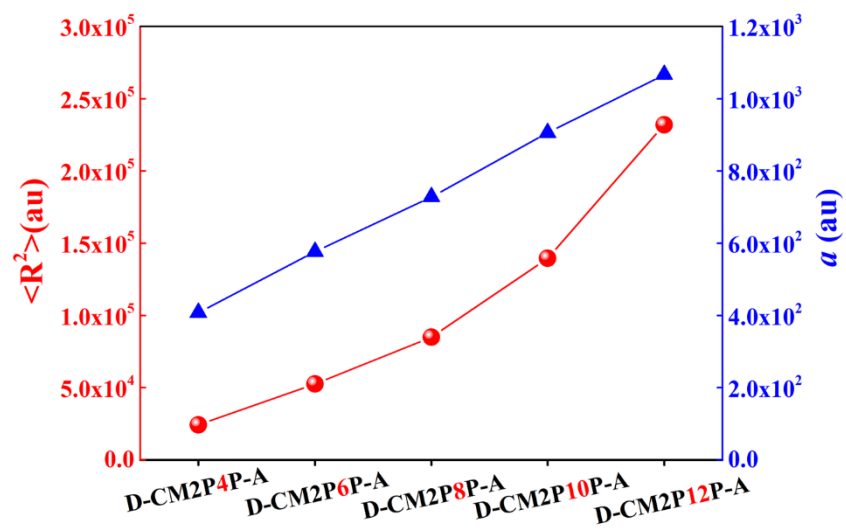

Figure S4. Relationship between the  $\alpha$  values and the corresponding  $\langle R^2 \rangle$  values of D-CM2PnP-A (n=4, 6, 8, 10, 12)

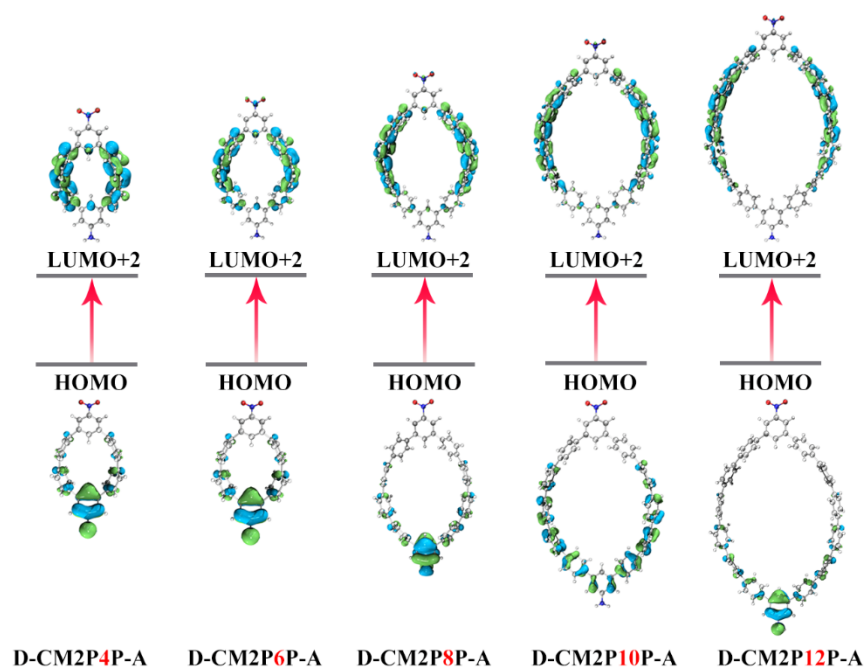

Figure S5. The molecular orbitals of the main excited states of D-CM2P<sub>n</sub>P-A (n=4, 6, 8, 10, 12)
